# Supplementary material
Source: Springer Nature journal article supplement (https://www.springermedizin.de/resource/supplementary/13063_2014_2259_MOESM4_ESM.pdf/9621756)

## Early intervention reduces parenting stress

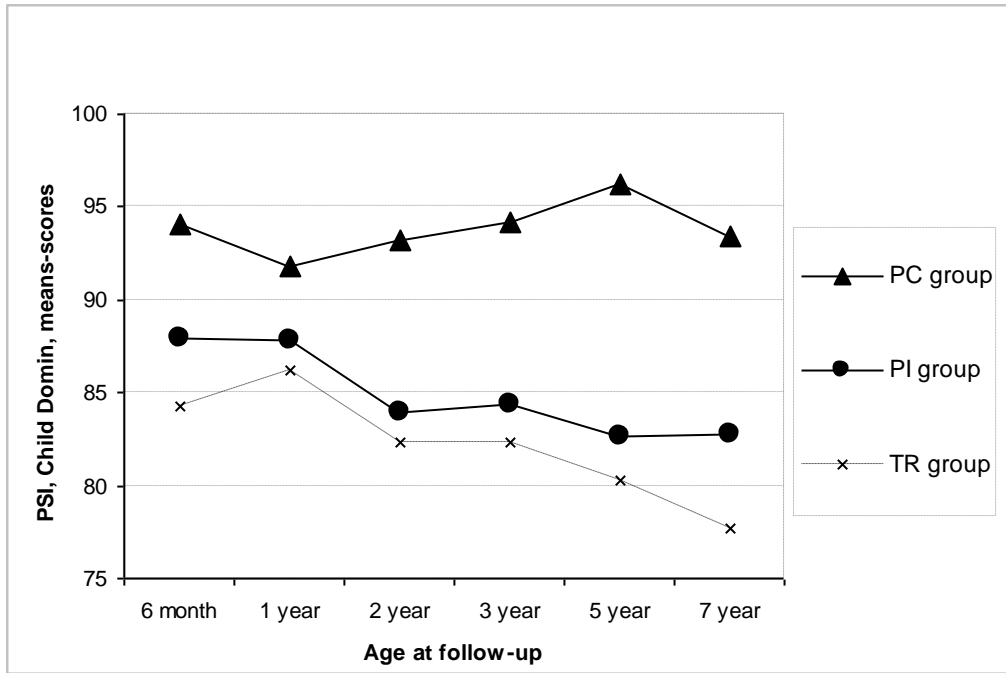

Supplement: MOESM4 [file 9621756]
